# Supplementary material for: Environmental determinants of E. coli, link with the diarrheal diseases, and indication of vulnerability criteria in tropical West Africa (Kapore, Burkina Faso)
Source: PubMed Central journal article supplement (PMC8370611; doi:10.1371/journal.pntd.0009634), 2021-08-17
Supplement: pntd.0009634.s006.pdf [file pntd.0009634.s006.pdf]

| <b>Variable</b>            | <b>Percent</b> |
|----------------------------|----------------|
| <b>SPM</b>                 | <b>79</b>      |
| <b>Weekly Rainfall</b>     | <b>71</b>      |
| <b>Water level</b>         | <b>4</b>       |
| <b>Cumulative rainfall</b> | <b>9</b>       |
| <b>Nb pixel water</b>      | <b>3</b>       |
| <b>NDVI</b>                | <b>32</b>      |
| <b>NIR band</b>            | <b>83</b>      |
| <b>Daily rainfall</b>      | <b>37</b>      |

**S1 Table. Percentage of the variability of *E. coli* explained by each of the variables for the 1st component**
