# Supplementary material for: Environmental determinants of E. coli, link with the diarrheal diseases, and indication of vulnerability criteria in tropical West Africa (Kapore, Burkina Faso)
Source: PubMed Central journal article supplement (PMC8370611; doi:10.1371/journal.pntd.0009634), 2021-08-17
Supplement: pntd.0009634.s007.pdf [file pntd.0009634.s007.pdf]

| <b>Variable</b>       | <b>Percent</b> |
|-----------------------|----------------|
| <b>SPM</b>            | <b>68</b>      |
| <b>Rainfall</b>       | <b>80</b>      |
| <b>Water level</b>    | <b>4</b>       |
| <i>E. coli</i>        | <b>73</b>      |
| <b>Nb pixel water</b> | <b>0.6</b>     |
| <b>NDVI</b>           | <b>67</b>      |
| <b>NIR</b>            | <b>83</b>      |

**S2 Table. Percentage of the variability of cases of diarrhea explained by each of the variables for the 1st component**
